# Supplementary material
Source: ML conference proceedings conference paper supplement (https://openreview.net/forum?id=3RpaTizIdH)
Supplement: supplementary_material [file supplementary_reproducibility_instructions.pdf › supplementary_reproducibility_instructions.pdf]

## **Supplementary Reproducibility Note**

For reproducibility, the authors provide the complete codebase to recreate all experiments and figures, the full suite of fine-tuning pipelines (including hybrid, triplet-only, RSA-only variants, and triplet-budget-matched), and pre-saved model checkpoints for convenience. A README details environment setup, data instructions and exact commands used to reproduce and run results. All materials are anonymized and packaged in the supplementary zip; for convenience they are also mirrored in an anonymized Drive folder:

[https://drive.google.com/drive/folders/1qoH82510A7Wdgfn\\_MtdwdWnBEGi9TS6O?dmr=1&ec=wgc-drive-globalnav-goto](https://drive.google.com/drive/folders/1qoH82510A7Wdgfn_MtdwdWnBEGi9TS6O?dmr=1&ec=wgc-drive-globalnav-goto).
